# Supplementary material for: H2O2-stimulated Janus-shaped self-propelled nanomotors as an active treatment for acute renal injury
Source: Royal Society of Chemistry journal article supplement (doi:10.1039/d3nr04808j), 2023-12-21
Supplement: d3nr04808j1.pdf [file d3nr04808j1.pdf]

## Supporting Information

### **H<sub>2</sub>O<sub>2</sub>-stimulated Janus-Shaped Self-Propelled Nanomotors as an Active Treatment for Acute Renal Injury**

Jun Xu<sup>1,#,\*</sup>, Yali Zhong<sup>2,#</sup>, Weixin Wang<sup>3,#</sup>, Rui Gao<sup>3,#</sup>, Yini Wang<sup>3,#</sup>, Fei Tong<sup>3,4,5#</sup>, Jiahui Sun<sup>3</sup>, Miaofang Hong<sup>3</sup>, Lingyan Qiao<sup>3</sup>, Weiwei Qiao<sup>3</sup>, Qibing Mei<sup>5</sup>, Jianming Wu<sup>5</sup>

<sup>1</sup>Department of Emergency, First Affiliated Hospital of Jiaxing University, Jiaxing, Zhejiang Province, China.

<sup>2</sup>Southwest University of Science and Technology, Mianyang, 621000, China.

<sup>3</sup>College of pharmacy, Binzhou Medical University, Yantai, 264003, PR China.

<sup>4</sup>School of Basic medical sciences, Zhejiang University Medicine, Hangzhou, 310000, PR China.

<sup>5</sup>Education Ministry Key Laboratory of Medical Electrophysiology, Sichuan Key Medical Laboratory of New Drug Discovery and Druggability Evaluation, Luzhou; Key Laboratory of Activity Screening and Druggability Evaluation for Chinese Materia Medica, School of Pharmacy, Southwest Medical University, Luzhou, 646000, China.

Jun Xu: [jiaxingxujun@163.com](mailto:jiaxingxujun@163.com); Yali Zhong: [804237965@qq.com](mailto:804237965@qq.com); Yini Wang: [BZwangyini@163.com](mailto:BZwangyini@163.com). Weixin Wang: [3155573681@qq.com](mailto:3155573681@qq.com); Fei Tong: [tongxuchang@163.com](mailto:tongxuchang@163.com); Rui Gao: [15065257158@163.com](mailto:15065257158@163.com); Jiahui Sun: [1223385134@qq.com](mailto:1223385134@qq.com); Miaofang Hong: [2162567696@qq.com](mailto:2162567696@qq.com); Lingyan Qiao: [joann\\_1029@163.com](mailto:joann_1029@163.com); Weiwei Qiao: [qwwi5@126.com](mailto:qwwi5@126.com); Qibing Mei: [Wu:qbmei53@hotmail.com](mailto:Wu:qbmei53@hotmail.com); Jianming Wu: [jianmingwu@swmu.edu.cn](mailto:jianmingwu@swmu.edu.cn).

\*Correspondence should be addressed to J.X. [jiaxingxujun@163.com](mailto:jiaxingxujun@163.com).

#Jun Xu, Yali Zhong, Weixin Wang, Rui Gao, Yini Wang and Fei Tong contributed equally to this work.

## **Methods**

### **Materials**

Chitosan was purchased from Shanghai Yuanye Bio-Technology Co., Ltd. (China). Melatonin was purchased from Sigma-Aldrich. L-serine was purchased from Shanghai Yuanye Bio-Technology Co., Ltd. (China). Reactive Oxygen Species Assay Kit was purchased from Biyuntian Biotechnology Co., Ltd. (China). MitoTracker® Green FM was purchased from Yisheng Biotechnology (Shanghai) Co., Ltd. (China). Lyso-Tracker Green was purchased from Biyuntian Biotechnology Co., Ltd. (China). Golgi-Tracker Green was purchased from Yisheng Biotechnology (Shanghai) Co., Ltd. (China). TUNEL kit was purchased from Abcam. H<sub>2</sub>O<sub>2</sub> kit was purchased from Abcam. BUN, Scr, SOD and MDA were purchased from Nanjing Jiancheng Bioengineering Research Institute Co., Ltd. (China). ABTS and DPPH were purchased from Beijing Zhongsheng Ruitai Technology Co., Ltd. (China). Kim-1, Cx43 and HIF-1 $\alpha$  antibodies were purchased from Sigma-Aldrich.

### **Synthesis of nanoparticles Pt@CS/Mel@S.**

Pt@CS (35.6 mg) was dissolved in PBS (50 mL) by uniform vibration, and a certain amount of TPP (0.1%, 5 mL), pectin (0.08%, 2 mL) and Mel (10 mg/mL) were added under stirring for 24 h. Next, the EDC (24.3 mg) and NHS (41.6 mg) were added to stir and then the 'S' (10 mg) was added to stir for 24 h and Pt@CS/Mel@S was achieved. Then morphology and size of Pt@CS/Mel@S were observed by TEM and SEM.

### **Particle size measurement**

The Pt@CS/Mel@S (PCMS) solution was first sonicated for 10 min, then 1 mL (100 µg/mL) PCMS was placed in a colorimetric dish and the particle size was detected by a Malvern Laser Particle Size Analyzer. And this particle size was repeated five times and the average value was calculated.

### **Loading rate and grafting**

5 mL (1 mg/mL) Pt@CS/Mel@S was added to a dialysis bag and immersed in 80 mL PBS containing different pH (7.4/6.5/5.0). At fixed time points, Mel concentrations were measured by ultraviolet absorption spectrum, and the solution was replenished with equivoluminal volume fresh buffer. Then the loading of Mel were calculated by the contents of released Mel [Loading rate % =(coagulant dosage - the amount of medication in the external fluid of the dialysis bag)/the amount of Pt@CS/Mel@S]. And the grafting of 'S' was calculated by ultraviolet absorption spectrum. And the detailed method was as follows:

Firstly, 5 mg of L-serine was dissolved in 5 mL of ultrapure water to prepare a solution with a concentration of 1 mg/mL. 1mL of L-serine solution was selected and placed in a colorimetric dish for UV spectral analysis. The absorbance standard curve of L-serine was obtained at 210 nm. Similarly, 1mL (1 mg/mL) of PCMS was selected and placed in a colorimetric dish. The absorbance at 210 nm was measured, and the grafting rate of L-serine was ultimately calculated.

### **Mel release**

5 mL (1 mg/mL) Pt@CS/Mel@S was added to a dialysis bag and immersed in 80 mL PBS containing different pH. At fixed time points, Mel concentrations were observed by ultraviolet absorption spectrum, and the solution was replenished with equivoluminal volume fresh buffer. Then the percentages of Mel release were calculated.

### **O<sub>2</sub> release**

20 mL (250 µg/mL) Pt@CS/Mel@S solution was added to the beaker, and added N<sub>2</sub> for 10 minutes and subsequently added different concentration H<sub>2</sub>O<sub>2</sub>. Then to add 5×10<sup>-6</sup> M Ru (dpp) <sub>3</sub>Cl<sub>2</sub> reaction for 4 hours; At different time points, the emission of O<sub>2</sub> was detected using a fluorescence spectrophotometer at a wavelength of 455/610 nm.

### **Cell viability**

The *in vitro* cytotoxicity was observed by the CCK-8 assay. Briefly, human renal tubular epithelial (HKC) cells cells (5×10<sup>6</sup>) were incubated on 96-well cell culture plates. The fresh DMEM containing different concentrations of Pt@CS/Mel@S were added and cultured for 24 h, respectively. In addition, the culture mediums were replaced with fresh DMEM including Pt@CS/Mel@S (200 µg/mL) and cultured for 24 h. CCK-8 solution (100 µL) was added for 2 h after washing twice with PBS. Then the absorbance was inspected at 450 nm to obtain the cell survival rates.

### **ROS observation**

Human renal tubular epithelial (HKC) cells cells in logarithmic phase were harvested in

confocal special dishes, and each dish was  $5 \times 10^6$  cells and incubated in an incubator for 12 h. Next Pt@CS/Mel@S (10  $\mu$ L, 1 mg/mL) was added and incubated for 6 h. Then reactive oxygen species assay kit was added for 30 min and fluorescence image was acquired by fluorescence microscope.

### **Cell colocalization**

Human renal tubular epithelial (HKC) cells cells in logarithmic phase were harvested in confocal special dishes, and each dish was  $5 \times 10^6$  cells and incubated in an incubator for 12 h. Next Pt@CS/Mel@S (10  $\mu$ L, 1 mg/mL) was added and incubated for 6 h. Then MitoTracker® Green FM or Lyso-Tracker Green or Golgi-Tracker Green was added for 30 min, and DAPI was added for 10 min and fluorescence image was observed by confocal microscopy.

### **Optical video recording**

The motion of the Pt@CS/Mel@S motors was measured by an inverted fluorescence microscope. First, the diluted Pt@CS/Mel@S motor solution was placed on a hydrophilic glass slide in different media. To observe the O<sub>2</sub> release movement from the Pt@CS/Mel@S motor, videos were recorded with a camera. The velocity and diffusion coefficient of the Pt@CS/Mel@S motors were measured using ImageJ and Chemotaxis. The *MSD* was estimated and calculated using  $MSD = 4D\Delta t + V^2\Delta t^2$ , where *D* was the diffusion coefficient of Brownian motion, *V* the velocity of autonomous motion.

## **Cell H<sub>2</sub>O<sub>2</sub>**

Human renal tubular epithelial (HKC) cells cells in logarithmic phase were harvested in confocal special dishes, and each dish was 5×10<sup>6</sup> cells and incubated in an incubator for 12 h. Next Pt@CS/Mel@S (10 μL, 1 mg/mL) was added and incubated for 6 h. H<sub>2</sub>O<sub>2</sub> level was observed by H<sub>2</sub>O<sub>2</sub> kit.

## **Animal model**

All Procedures of Animals Experimental Works were consistent with the guidelines of institutional animal care and use committee of ‘Jiaxing University’. All Experimental Works complied with the relevant ‘Laws’ or ‘Guidelines’. All of Experimental Works followed the Institutional Guidelines. All Animal Procedures of Animals Experimental Works were performed in accordance with the ‘Guide’ for the care and use of laboratory animals of ‘Jiaxing University’, and the Animals Experimental Works were approved by the animal ethics committee of ‘Jiaxing University’.

BALB/c mice (male, 25-30 g) were obtained from Zhejiang Experimental Animal Center and the mice were anesthetized with 1% pentobarbital sodium, and the abdominal cavity was opened and the renal arteries and veins were separated. The right renal artery and vein were clipped for 30 min, and then perfused for 48 h to create an AKI model.

## ***In vivo* biodistribution and therapeutic effects**

After intravenous injection of Pt@CS/Mel@S motors (15 mg/kg), the *in vivo* fluorescence distribution in AKI mouse was measured at fixed times using a multimode small-animal imaging system *in vivo*. Subsequently, the AKI region in the mice was measured by a ultrasound imaging.

35 BALB/c mice (male, 25-30 g) were divided into 7 groups: 1) control; 2) AKI; 3) Mel; 4) CM; 5) PCM; 6) CMS; 7) PCMS and each group was 5. After intravenous injection of Pt@CS/Mel@S motors (15 mg/kg), and the serum and tissues were separated. The BUN, Scr, SOD, MDA, H<sub>2</sub>O<sub>2</sub> and scavenging of ROS ratio by kits, HE staining and TUNEL staining (TUNEL kit) were measured. And the Kim-1, Cx43 and HIF-1 $\alpha$  expressions were observed by immunohistochemistry. (CM, CS/Mel; PCM, Pt@CS/Mel; CMS, CS/Mel@S; PCMS, Pt@CS/Mel@S; Mel, melatonin; CS, chitosan; S, L-serine).

### **Statistical analysis**

The statistical significances in different groups were estimated through one-way ANOVA with post hoc test. Values of  $P < 0.01$  were considered to display statistical significance in different groups.



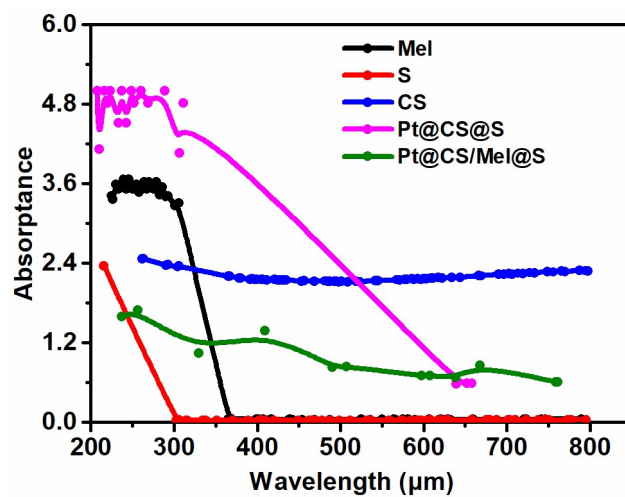

**Figure S1 I** Ultraviolet absorption spectrum of Mel, S, CS, Pt@CS@S and Pt@CS/Mel@S.

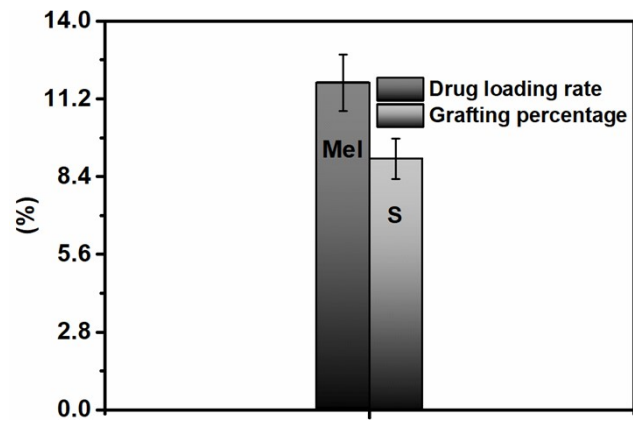

**Figure S2 I** Loading rate of Mel and grafting percentage of S. n=5.

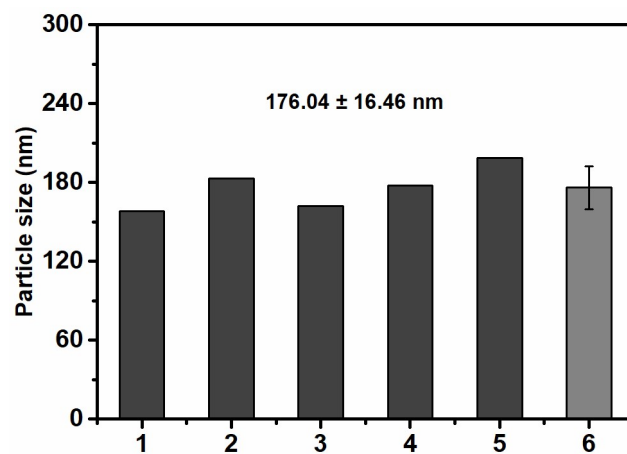

**Figure S3 I** Particle size of PCMS (1-5 was when we repeated the data five times and 6 was the average of the first five replicates). n=5

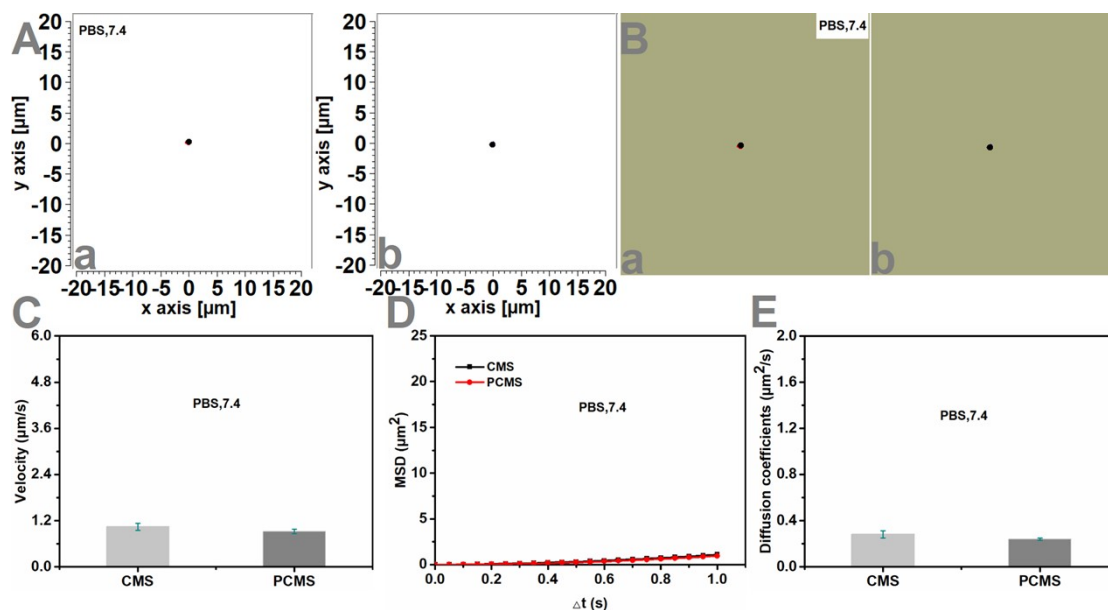

**Figure S4 I Motion of Nanomotors.** (A) Motion trajectories (10 s) of PCMS nanomotors at PBS, 7.4 (a, CMS; b, PCMS). (B) Time-lapse images of PCMS nanomotors at PBS, 7.4 (a, CMS; b, PCMS). (C) The velocity of PCMS nanomotors at PBS, 7.4. (D) *MSD* of PCMS nanomotors at PBS, 7.4. The directional motion was fitted to the Equation  $(4D)\Delta t + (V^2)(\Delta t^2)$ , and the Brownian motion was fitted to the Equation  $(4D)\Delta t$ . (E) The diffusion coefficients of PCMS nanomotors at PBS, 7.4. (CMS, CS/Mel@S; PCMS, Pt@CS/Mel@S; Mel, melatonin; CS, chitosan; S, L-serine). n=20

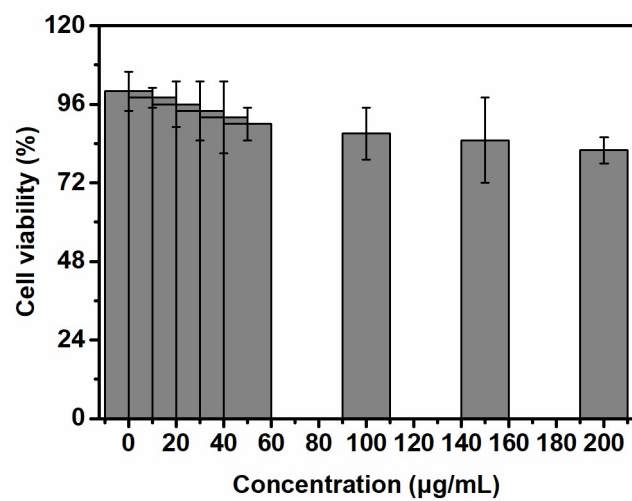

**Figure S5 I** Cell viability of PCMS. n=5.

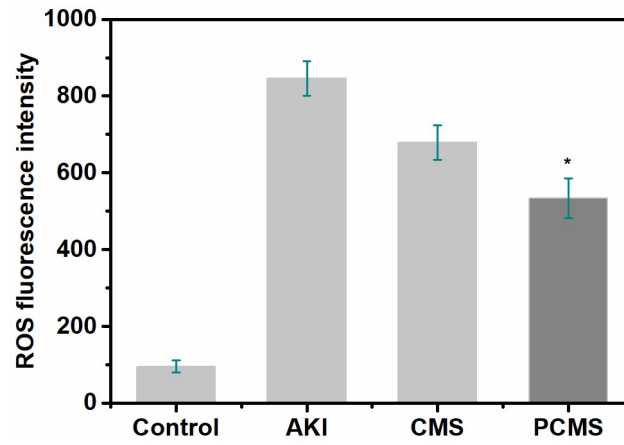

**Figure S6 I ROS fluorescence intensity *in vitro* in AKI.** ROS fluorescence intensity after after different treatments. (CMS, CS/Mel@S; PCMS, Pt@CS/Mel@S; Mel, melatonin; CS, chitosan; S, L-serine). n=5

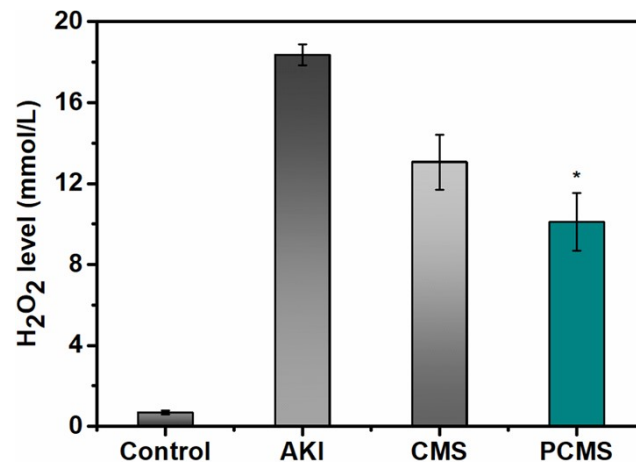

**Figure S7 I H<sub>2</sub>O<sub>2</sub> level *in vitro* in AKI.** H<sub>2</sub>O<sub>2</sub> level after after different treatments. (CMS, CS/Mel@S; PCMS, Pt@CS/Mel@S; Mel, melatonin; CS, chitosan; S, L-serine). n=5

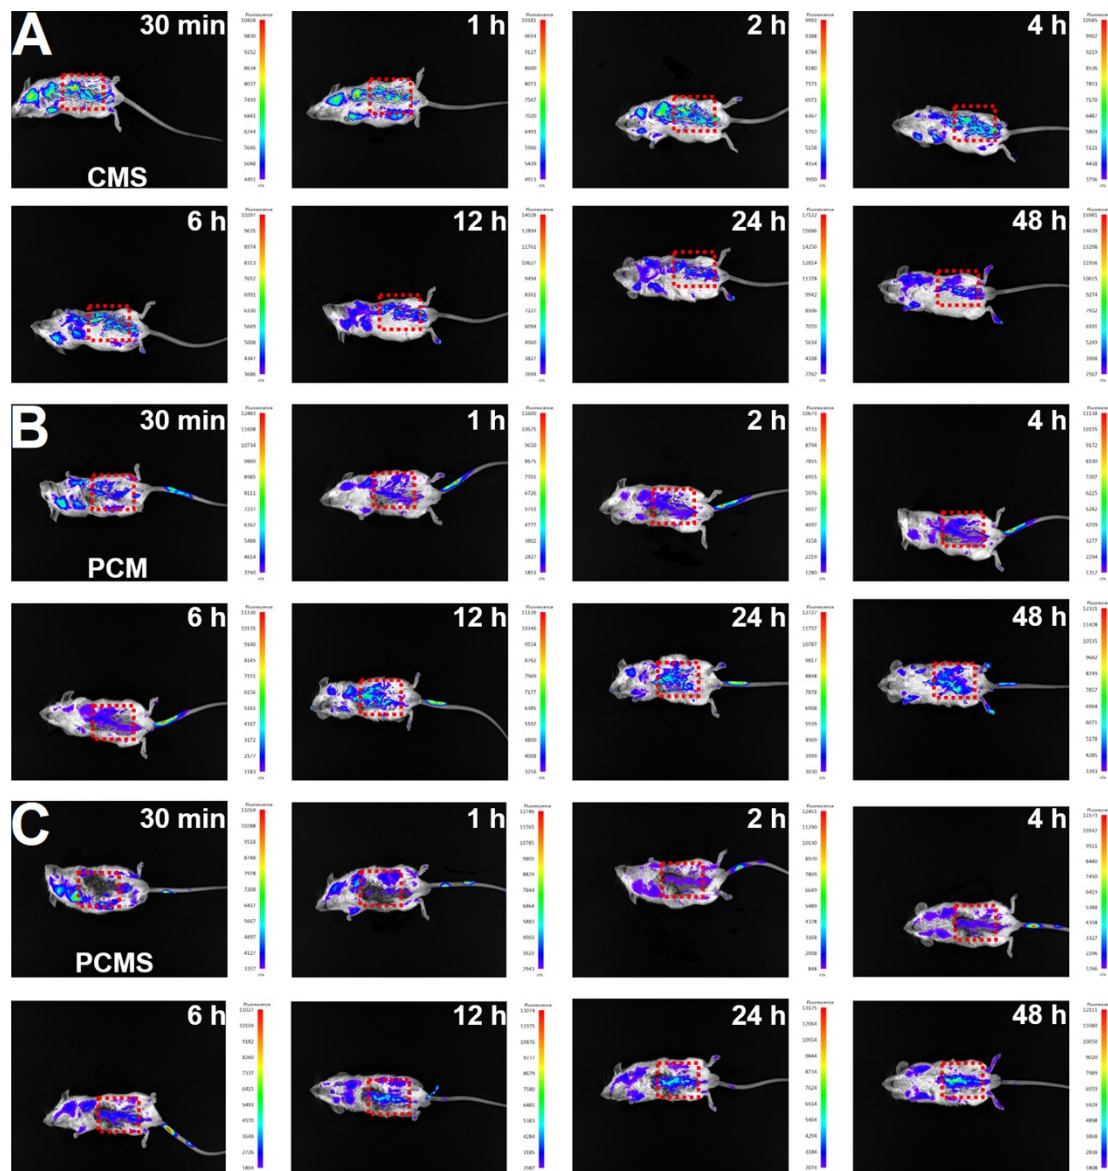

**Figure S8 I *In vivo* biodistribution of PCMS nanomotors.** (A) *In vivo* distribution of FITC-conjugated CMS nanomotors at different time points. (B) *In vivo* distribution of FITC-conjugated PCM nanomotors at different time points. (C) *In vivo* distribution of FITC-conjugated PCMS nanomotors at different time points. (PCMS, Pt@CS/Mel@S; PCM, Pt@CS/Mel; CMS, CS/Mel@S).



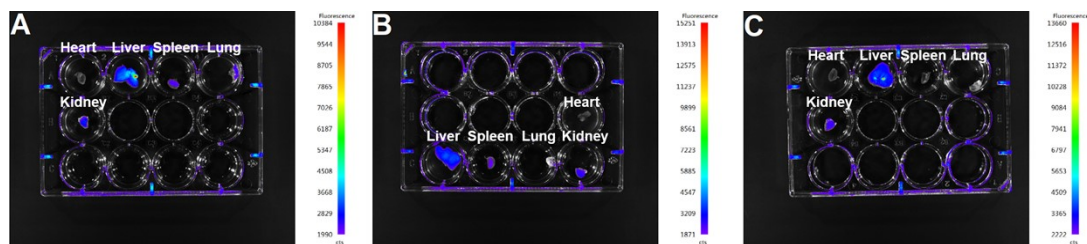

**Figure S9 I** (A) Live imaging of the *in vivo* tissue after FITC-CMS administration. (B) Live imaging of the *in vivo* tissue after FITC-PCM administration. (C) Live imaging of the *in vivo* tissue after FITC-PCM administration. (PCMS, Pt@CS/Mel@S; PCM, Pt@CS/Mel@; CMS, CS/Mel@; Mel, melatonin; CS, chitosan; S, L-serine).

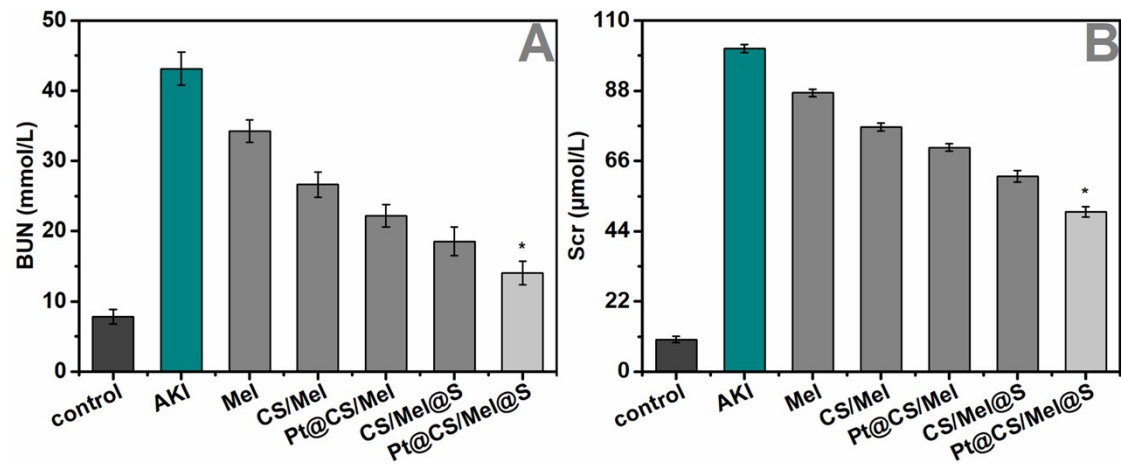

**Figure S10 I** The BUN (A) and Scr (B) after different treatments by intravenous administration. n=5

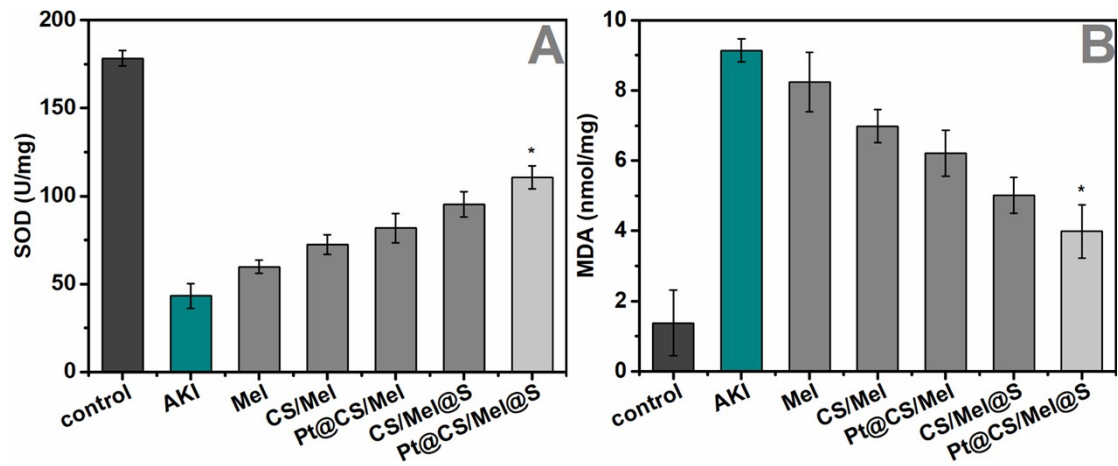

**Figure S11 I** SOD (A) and MDA (B) contents in renal tissues after different treatments by intravenous administration. n=5

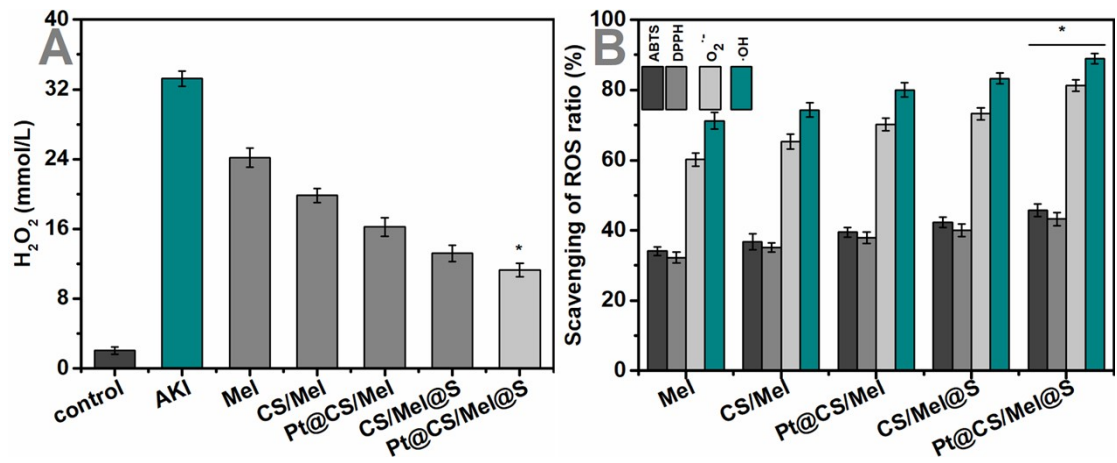

**Figure S12 I** H<sub>2</sub>O<sub>2</sub> (A) and Scavenging of ROS ratio (B) after different treatments by intravenous administration. n=5

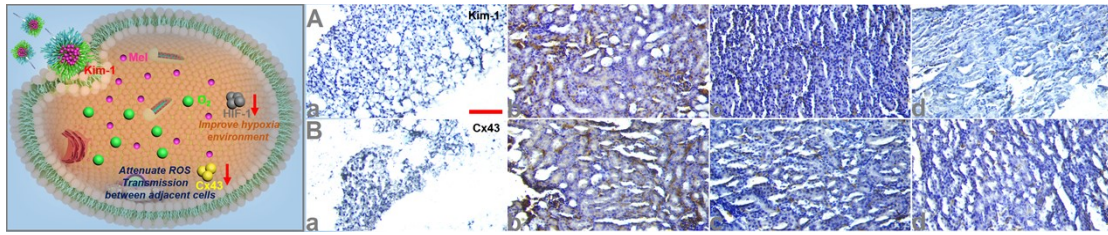

**Figure S13 I** *In vivo* immunohistochemical analysis. Kim-1 (**A**) and Cx43 (**B**) expressions in renal tissues after different treatments. (a, control; b, AKI; c, CS/Mel@S; d, Pt@CS/Mel@S).

Scale bar: 50  $\mu$ m. (Mel, melatonin; CS, chitosan; S, L-serine).

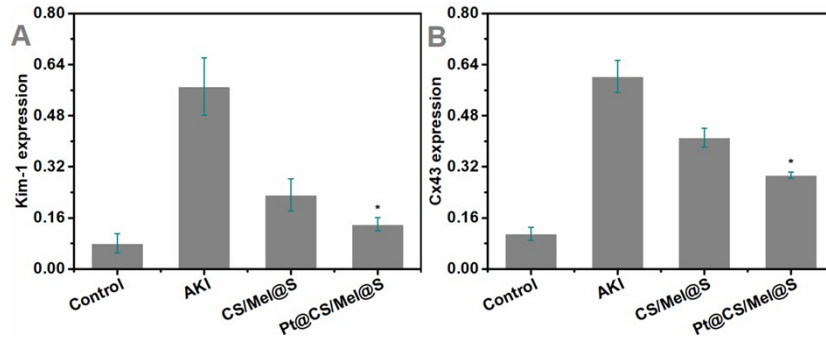

**Figure S14 I** The quantitative analysis (%) of Kim-1 (C) and Cx43 (D) expressions in renal tissues after different treatments. (a, control; b, AKI; c, CS/Mel@S; d, Pt@CS/Mel@S). Scale bar: 50  $\mu$ m. (Mel, melatonin; CS, chitosan; S, L-serine).

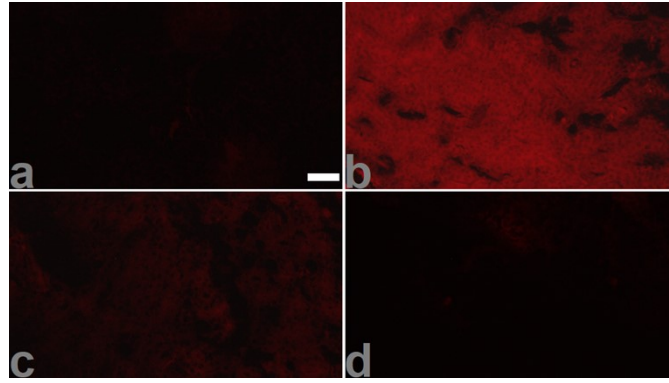

**Figure S15 I** *In vivo* immunofluorescence analysis of AF-594-HIF-1 $\alpha$  in renal tissues after different treatments (a, control; b, AKI; c, CS/Mel@S; d, Pt@CS/Mel@S). Scale bar: 50  $\mu$ m. (Mel, melatonin; CS, chitosan; S, L-serine).
