# Supplementary material for: H2O2-stimulated Janus-shaped self-propelled nanomotors as an active treatment for acute renal injury
Source: Royal Society of Chemistry journal article supplement (doi:10.1039/d3nr04808j), 2023-12-21
Supplement: d3nr04808j2.pdf [file d3nr04808j2.pdf]

## SUPPORTING INFORMATION

**Video S1:** The motion of CMS and PCMS in PBS (pH 7.4).

**Video S2:** The motion of CMS and PCMS in PBS (pH 7.4+50  $\mu\text{M}$   $\text{H}_2\text{O}_2$ ).

**Video S3:** The motion of CMS and PCMS in PBS (pH 7.4+500  $\mu\text{M}$   $\text{H}_2\text{O}_2$ ).

**Video S4:** The motion of CMS *in vivo* in heart, lung, liver, spleen and renal tissues.

**Video S5:** The motion of PCM *in vivo* in heart, lung, liver, spleen and renal tissues.

**Video S6:** The motion of PCMS *in vivo* in heart, lung, liver, spleen and renal tissues.
